# Supplementary material
Source: PubMed Central journal article supplement (PMC8335528)
Supplement: NIHMS1716588-supplement-supporting_information.pdf [file NIHMS1716588-supplement-supporting_information.pdf]

# Supporting Information

## Accelerated Computation of Free Energy Profile at *Ab Initio* Quantum Mechanical/Molecular Mechanics Accuracy via a Semiempirical Reference Potential. 4. Adaptive QM/MM

Jia-Ning Wang,<sup>†</sup> Wei Liu,<sup>†,⊥</sup> Pengfei Li,<sup>\*,†,#</sup> Yan Mo,<sup>\*,†,‡,¶</sup> Wenxin Hu,<sup>§</sup> Jun  
Zheng,<sup>§</sup> Xiaoliang Pan,<sup>||</sup> Yihan Shao,<sup>||</sup> and Ye Mei<sup>\*,†,‡,¶</sup>

<sup>†</sup>*State Key Laboratory of Precision Spectroscopy, School of Physics and Electronic Science,  
East China Normal University, Shanghai 200062, China*

<sup>‡</sup>*NYU-ECNU Center for Computational Chemistry at NYU Shanghai, Shanghai 200062,  
China*

<sup>¶</sup>*Collaborative Innovation Center of Extreme Optics, Shanxi University, Taiyuan, Shanxi  
030006, China*

<sup>§</sup>*The Computer Center, School of Data Science & Engineering, East China Normal  
University, Shanghai 200062, China*

<sup>||</sup>*Department of Chemistry and Biochemistry, University of Oklahoma, Norman Oklahoma  
73019, United States*

<sup>⊥</sup>*Current address: Center for Integrative Imaging, Hefei National Laboratory for Physical  
Sciences at the Microscale, and School of Life Sciences, University of Science and  
Technology of China (USTC), Hefei, Anhui 230026, China*

<sup>#</sup>*Current address: Silicon Therapeutics (Suzhou) Co., Ltd., Suzhou, Jiangsu 215000, China*

E-mail: alan.pengfeili@gmail.com; ymo@phy.ecnu.edu.cn; samuel.y.mei@gmail.com

# 1 The restraints in the umbrella sampling simulations

The umbrella sampling was carried out with 84 windows, and the restraints are (restraint center in a unit of Å,  $k$  in  $\frac{1}{2}k(\xi_m - \xi(\mathbf{r}))^2$  in a unit of  $kcal/mol/\text{Å}^2$ ):

(1.500, 1800.00), (1.525, 1400.00), (1.550, 1000.00), (1.575, 800.00), (1.600, 600.00), (1.625, 400.00), (1.650, 200.00), (1.675, 250.00), (1.700, 300.00), (1.750, 600.00), (1.800, 600.00), (1.850, 800.00), (1.900, 800.00), (1.950, 800.00), (2.000, 1200.00), (2.025, 600.00), (2.050, 600.00), (2.075, 600.00), (2.100, 400.00), (2.150, 400.00), (2.200, 320.00), (2.250, 200.00), (2.300, 200.00), (2.350, 200.00), (2.400, 200.00), (2.450, 200.00), (2.500, 200.00), (2.550, 200.00), (2.600, 200.00), (2.650, 200.00), (2.700, 200.00), (2.750, 200.00), (2.800, 200.00), (2.825, 200.00), (2.850, 200.00), (2.875, 200.00), (2.900, 200.00), (2.950, 200.00), (3.000, 200.00), (3.050, 200.00), (3.100, 200.00), (3.150, 200.00), (3.200, 200.00), (3.250, 200.00), (3.300, 200.00), (3.350, 200.00), (3.400, 200.00), (3.450, 200.00), (3.500, 200.00), (3.550, 200.00), (3.600, 200.00), (3.650, 200.00), (3.700, 200.00), (3.750, 200.00), (3.800, 200.00), (3.850, 200.00), (3.900, 200.00), (3.950, 200.00), (4.000, 200.00), (4.025, 200.00), (4.050, 200.00), (4.075, 200.00), (4.100, 200.00), (4.150, 200.00), (4.200, 200.00), (4.250, 200.00), (4.300, 200.00), (4.350, 200.00), (4.400, 200.00), (4.450, 200.00), (4.475, 200.00), (4.500, 200.00), (4.525, 200.00), (4.550, 200.00), (4.575, 200.00), (4.600, 200.00), (4.650, 200.00), (4.700, 200.00), (4.750, 200.00), (4.800, 200.00), (4.850, 200.00), (4.900, 200.00), (4.950, 200.00), (5.000, 200.00)

## 2 Alternations of the total Mulliken charge of the two water molecules in the QM region at the PM6/MM level with two water molecules in the QM region

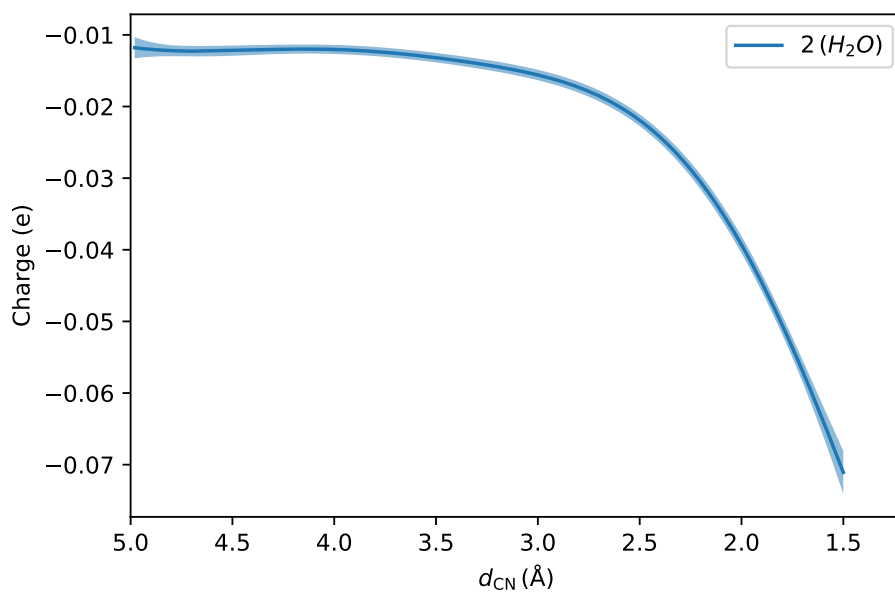

Figure S1: Alternations of the total Mulliken charge of the two water molecules in the QM region at the PM6/MM level with two water molecules in the QM region. The shaded areas are the 95% confidence intervals.

### 3 Comparison of the free energy profiles with three water molecules in the QM region from restrained simulation and the adaptive simulation

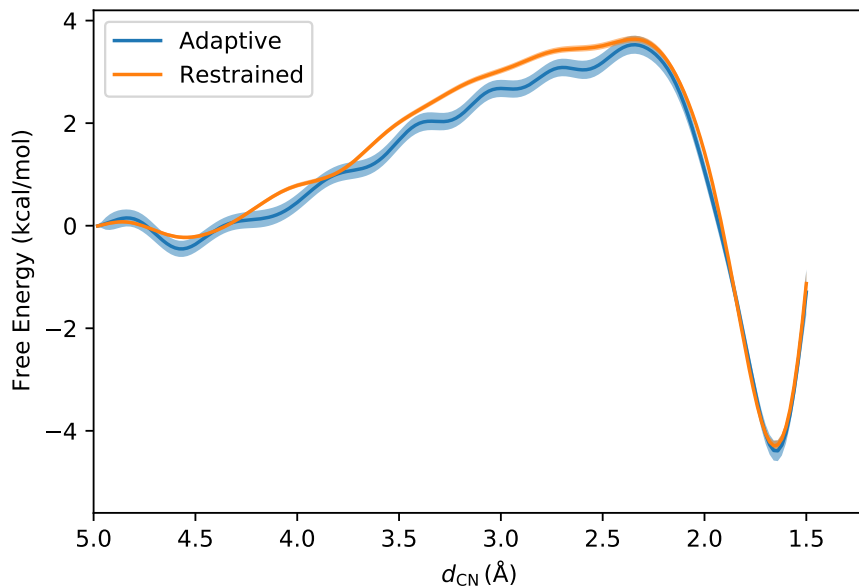

Figure S2: Free energy profiles at the PM6/MM level with three water molecules in the QM region from restrained QM/MM simulation (orange) and the adaptive QM/MM simulation (blue). The shaded areas are the 95% confidence intervals.

## 4 Alternative partition scheme with two water molecules in the QM region

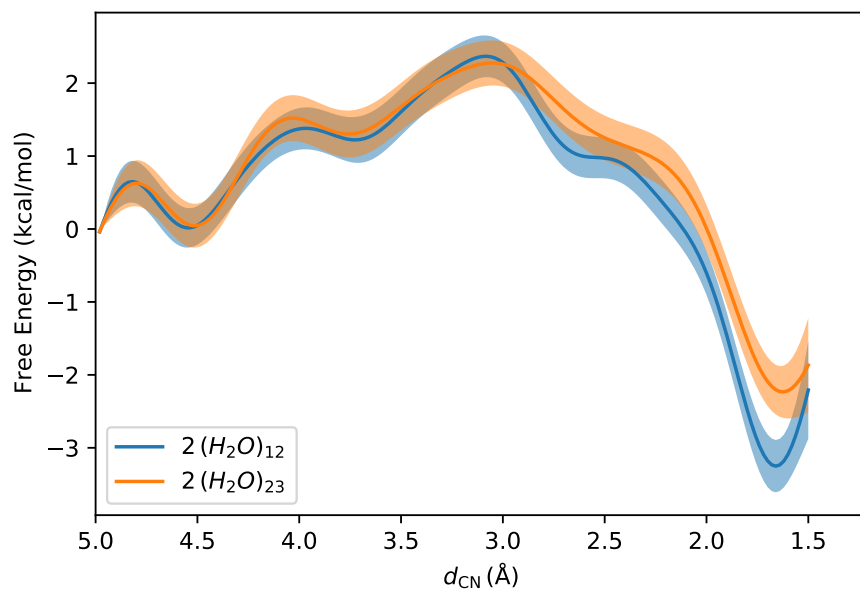

Figure S3: Free energy profiles at the DFT/MM levels with the nearest two water molecules included in the QM region (blue), and with the 2nd and the 3rd nearest water molecules in the QM region (orange). The shaded areas are the 95% confidence intervals.
